# Supplementary material for: Dynamic Changes in Microbiome Composition Following Mare’s Milk Intake for Prevention of Collateral Antibiotic Effect
Source: Front Cell Infect Microbiol. 2021 Apr 21;11:622735. doi: 10.3389/fcimb.2021.622735 (PMC8097163; doi:10.3389/fcimb.2021.622735)
Supplement: Supplementary file 2 [file Table_1.xlsx]

## Sheet: Phylum
Taxon	P (baseline vs ABX)	Effect size (baseline vs ABX)	P (baseline vs conclusion)	Effect size (baseline vs conclusion)	FDR (baseline vs conclusion)	FDR (baseline vs ABX)
?;unknown_?	0.129068	-0.142857	0.163147	-0.142857	0.299102	0.354188
Bacteria;Actinobacteria	0.146718	-0.153061	0.191894	-0.012987	0.301548	0.354188
Bacteria;Bacteroidetes	0.166068	-0.387755	0.327457	-0.402597	0.400226	0.354188
Bacteria;Cyanobacteria	0.210246	-0.0204082	0.161379	-0.116883	0.299102	0.354188
Bacteria;Epsilonbacteraeota	0.325739	-0.214286	0.147408	-0.285714	0.299102	0.390887
Bacteria;Firmicutes	0.0603039	0.489796	0.129222	0.584416	0.299102	0.354188
Bacteria;Fusobacteria	0.820631	0.0714286	NA	0	NA	0.820631
Bacteria;Lentisphaerae	0.12431	-0.142857	0.158837	-0.142857	0.299102	0.354188
Bacteria;Proteobacteria	0.2583	0.112245	0.319803	0.116883	0.400226	0.354188
Bacteria;Synergistetes	NA	0	NA	0	NA	NA
Bacteria;Tenericutes	0.24336	0.234694	0.616867	0.194805	0.63044	0.354188
Bacteria;unknown_Bacteria	0.641482	-0.0714286	0.63044	-0.012987	0.63044	0.699799
Eukaryota;Vertebrata	0.265641	-0.0612245	0.158837	-0.142857	0.299102	0.354188
|δ| < 0.33 corresponds to small,
|δ| < 0.474 corresponds to medium,
otherwise large.

## Sheet: Class
Taxon	P (baseline vs ABX)	Effect size (baseline vs ABX)	P (baseline vs conclusion)	Effect size (baseline vs conclusion)	FDR (baseline vs conclusion)	FDR (baseline vs ABX)
?;unknown_?;unknown_?	0.129068	-0.142857	0.163147	-0.142857	0.358848	0.347307
Bacteria;Actinobacteria;Actinobacteria	0.104332	-0.163265	0.132074	-0.0909091	0.358848	0.347307
Bacteria;Actinobacteria;Coriobacteriia	0.50163	0.0102041	0.310325	0.25974	0.469314	0.535072
Bacteria;Bacteroidetes;Bacteroidia	0.160858	-0.326531	0.331281	-0.376623	0.469314	0.347307
Bacteria;Cyanobacteria;Melainabacteria	0.20724	0.102041	0.162065	-0.0649351	0.358848	0.347307
Bacteria;Epsilonbacteraeota;Campylobacteria	0.271746	-0.214286	0.147053	-0.220779	0.358848	0.347307
Bacteria;Firmicutes;Bacilli	0.160607	0.265306	0.303279	0.350649	0.469314	0.347307
Bacteria;Firmicutes;Clostridia	0.0408843	0.357143	0.16887	0.558442	0.358848	0.327074
Bacteria;Firmicutes;Erysipelotrichia	0.022348	-0.479592	0.224404	-0.376623	0.423875	0.327074
Bacteria;Firmicutes;Negativicutes	0.995816	0.0408163	0.49213	0.0649351	0.557747	0.995816
Bacteria;Lentisphaerae;Lentisphaeria	NA	0	0.406253	0.0909091	0.507347	NA
Bacteria;Proteobacteria;Alphaproteobacteria	0.140943	0.0408163	0.164526	-0.0649351	0.358848	0.347307
Bacteria;Proteobacteria;Deltaproteobacteria	0.282187	0.357143	0.150409	0.545455	0.358848	0.347307
Bacteria;Proteobacteria;Gammaproteobacteria	0.201549	-0.163265	0.784029	0.0909091	0.787016	0.347307
Bacteria;Synergistetes;Synergistia	NA	0	NA	0	NA	NA
Bacteria;Tenericutes;Mollicutes	0.264412	-0.0204082	0.787016	-0.103896	0.787016	0.347307
Bacteria;unknown_Bacteria;unknown_Bacteria	0.359415	0.0918367	0.417815	-0.12987	0.507347	0.41076
Eukaryota;Vertebrata;Mammalia	0.269203	-0.0612245	0.158837	-0.142857	0.358848	0.347307
|δ| < 0.33 corresponds to small,
|δ| < 0.474 corresponds to medium,
otherwise large.

## Sheet: Order
Taxon	P (baseline vs ABX)	Effect size (baseline vs ABX)	P (baseline vs conclusion)	Effect size (baseline vs conclusion)	FDR (baseline vs conclusion)	FDR (baseline vs ABX)
?;unknown_?;unknown_?;unknown_?	NA	0	NA	0	NA	NA
Bacteria;Actinobacteria;Actinobacteria;Actinomycetales	0.163366	-0.214286	0.152214	-0.207792	0.385231	0.445161
Bacteria;Actinobacteria;Actinobacteria;Corynebacteriales	0.0705759	-0.285714	0.122882	-0.220779	0.385231	0.445161
Bacteria;Actinobacteria;Actinobacteria;Micrococcales	0.282244	-0.0816327	0.728502	-0.0519481	0.764927	0.445161
Bacteria;Actinobacteria;Actinobacteria;Propionibacteriales	0.12431	-0.142857	0.158837	-0.142857	0.385231	0.445161
Bacteria;Actinobacteria;Coriobacteriia;Coriobacteriales	0.465866	0.0816327	0.452938	0.155844	0.621024	0.548078
Bacteria;Bacteroidetes;Bacteroidia;Bacteroidales	0.199133	-0.367347	0.331042	-0.38961	0.579323	0.445161
Bacteria;Cyanobacteria;Melainabacteria;Gastranaerophilales	0.164236	-0.0612245	0.152751	-0.272727	0.385231	0.445161
Bacteria;Epsilonbacteraeota;Campylobacteria;Campylobacterales	0.311613	-0.214286	0.151182	-0.285714	0.385231	0.445161
Bacteria;Firmicutes;Bacilli;Bacillales	0.805081	-0.0612245	0.728502	-0.0519481	0.764927	0.894534
Bacteria;Firmicutes;Bacilli;Lactobacillales	0.1437	0.153061	0.36067	0.025974	0.582621	0.445161
Bacteria;Firmicutes;Clostridia;Clostridiales	0.0507259	0.428571	0.165099	0.584416	0.385231	0.445161
Bacteria;Firmicutes;Clostridia;unknown_Clostridia	0.457231	0.0714286	0.329136	0.181818	0.579323	0.548078
Bacteria;Firmicutes;Erysipelotrichia;Erysipelotrichales	0.210677	-0.295918	0.397882	-0.272727	0.596823	0.445161
Bacteria;Firmicutes;Negativicutes;Selenomonadales	0.192406	0.183673	0.473161	0.0779221	0.621024	0.445161
Bacteria;Firmicutes;unknown_Firmicutes;unknown_Firmicutes	NA	0	NA	0	NA	NA
Bacteria;Lentisphaerae;Lentisphaeria;Victivallales	NA	0	NA	0	NA	NA
Bacteria;Proteobacteria;Alphaproteobacteria;Rhodospirillales	0.958638	-0.0612245	0.156713	-0.142857	0.385231	0.958638
Bacteria;Proteobacteria;Deltaproteobacteria;Desulfovibrionales	0.297351	0.173469	0.554583	-0.0519481	0.685073	0.445161
Bacteria;Proteobacteria;Gammaproteobacteria;Enterobacteriales	0.368741	0.142857	0.219871	0.363636	0.461729	0.491654
Bacteria;Proteobacteria;Gammaproteobacteria;Pasteurellales	NA	0	0.110372	0.363636	0.385231	NA
Bacteria;Synergistetes;Synergistia;Synergistales	NA	0	NA	0	NA	NA
Bacteria;Tenericutes;Mollicutes;Mollicutes_RF39	0.24561	0.163265	0.646561	0.168831	0.754321	0.445161
Bacteria;unknown_Bacteria;unknown_Bacteria;unknown_Bacteria	0.942919	0.0612245	0.972148	-0.0779221	0.972148	0.958638
Eukaryota;Vertebrata;Mammalia;unknown_Mammalia	0.261113	-0.0612245	0.158837	-0.142857	0.385231	0.445161
|δ| < 0.33 corresponds to small,
|δ| < 0.474 corresponds to medium,
otherwise large.

## Sheet: Family
Taxon	P (baseline vs ABX)	Effect size (baseline vs ABX)	P (baseline vs conclusion)	Effect size (baseline vs conclusion)	FDR (baseline vs conclusion)	FDR (baseline vs ABX)
?;unknown_?;unknown_?;unknown_?;unknown_?	NA	0	NA	0	NA	NA
Bacteria;Actinobacteria;Actinobacteria;Actinomycetales;Actinomycetaceae	0.170901	-0.214286	0.163296	-0.194805	0.438858	0.590612
Bacteria;Actinobacteria;Actinobacteria;Corynebacteriales;Corynebacteriaceae	0.0509621	-0.234694	0.0947638	-0.155844	0.438858	0.590612
Bacteria;Actinobacteria;Actinobacteria;Micrococcales;Micrococcaceae	0.209033	-0.0816327	0.158837	-0.142857	0.438858	0.590612
Bacteria;Actinobacteria;Coriobacteriia;Coriobacteriales;Coriobacteriaceae	0.384252	0.142857	0.31761	0.181818	0.645054	0.677964
Bacteria;Actinobacteria;Coriobacteriia;Coriobacteriales;Eggerthellaceae	0.994281	0	0.715606	-0.038961	0.791182	1
Bacteria;Bacteroidetes;Bacteroidia;Bacteroidales;Bacteroidaceae	0.282206	-0.122449	0.457607	-0.181818	0.65585	0.590612
Bacteria;Bacteroidetes;Bacteroidia;Bacteroidales;Barnesiellaceae	0.287089	-0.153061	0.420035	-0.454545	0.645054	0.590612
Bacteria;Bacteroidetes;Bacteroidia;Bacteroidales;Marinifilaceae	0.168448	-0.234694	0.0804444	-0.181818	0.438858	0.590612
Bacteria;Bacteroidetes;Bacteroidia;Bacteroidales;Muribaculaceae	0.563768	0.0612245	6.0845e-17	-0.0519481	2.61633e-15	0.713001
Bacteria;Bacteroidetes;Bacteroidia;Bacteroidales;Porphyromonadaceae	0.990739	-0.193878	0.0979479	-0.220779	0.438858	1
Bacteria;Bacteroidetes;Bacteroidia;Bacteroidales;Prevotellaceae	0.355095	-0.0918367	0.488104	0.012987	0.655889	0.663872
Bacteria;Bacteroidetes;Bacteroidia;Bacteroidales;Rikenellaceae	0.176444	-0.387755	0.10039	-0.441558	0.438858	0.590612
Bacteria;Bacteroidetes;Bacteroidia;Bacteroidales;Tannerellaceae	0.967598	-0.0102041	0.536631	0.012987	0.699246	1
Bacteria;Bacteroidetes;Bacteroidia;Bacteroidales;unknown_Bacteroidales	0.855604	-0.163265	0.774976	-0.220779	0.8331	0.99435
Bacteria;Bacteroidetes;Bacteroidia;Cytophagales;Microscillaceae	NA	0	NA	0	NA	NA
Bacteria;Cyanobacteria;Melainabacteria;Gastranaerophilales;Candidatus_Melainabacteria_bacterium_MEL.A1	0.442746	-0.122449	0.04125	-0.285714	0.438858	0.677964
Bacteria;Cyanobacteria;Melainabacteria;Gastranaerophilales;unknown_Gastranaerophilales	0.300508	0.285714	NA	0	NA	0.590612
Bacteria;Epsilonbacteraeota;Campylobacteria;Campylobacterales;Campylobacteraceae	0.289444	-0.214286	0.151576	-0.285714	0.438858	0.590612
Bacteria;Firmicutes;Bacilli;Bacillales;Family_XI	NA	0	0.381909	0.0909091	0.645054	NA
Bacteria;Firmicutes;Bacilli;Lactobacillales;Aerococcaceae	0.450191	0.0714286	NA	0	NA	0.677964
Bacteria;Firmicutes;Bacilli;Lactobacillales;Carnobacteriaceae	1	-0.0612245	0.836931	0.038961	0.85782	1
Bacteria;Firmicutes;Bacilli;Lactobacillales;Enterococcaceae	0.250565	0	0.176382	-0.0649351	0.446142	0.590612
Bacteria;Firmicutes;Bacilli;Lactobacillales;Lactobacillaceae	0.264481	-0.122449	0.664263	-0.038961	0.778888	0.590612
Bacteria;Firmicutes;Bacilli;Lactobacillales;Leuconostocaceae	0.450191	0.0714286	0.406253	0.0909091	0.645054	0.677964
Bacteria;Firmicutes;Bacilli;Lactobacillales;Streptococcaceae	0.515648	0.295918	0.302766	0.25974	0.645054	0.713001
Bacteria;Firmicutes;Clostridia;Clostridiales;Christensenellaceae	0.563161	-0.142857	0.0697564	-0.428571	0.438858	0.713001
Bacteria;Firmicutes;Clostridia;Clostridiales;Defluviitaleaceae	NA	0	0.381909	0.0909091	0.645054	NA
Bacteria;Firmicutes;Clostridia;Clostridiales;Eubacteriaceae	0.129068	-0.142857	0.670206	-0.038961	0.778888	0.590612
Bacteria;Firmicutes;Clostridia;Clostridiales;Family_XI	0.546978	-0.193878	0.0660818	-0.155844	0.438858	0.713001
Bacteria;Firmicutes;Clostridia;Clostridiales;Family_XIII	0.280304	-0.142857	0.669142	0.025974	0.778888	0.590612
Bacteria;Firmicutes;Clostridia;Clostridiales;Lachnospiraceae	0.619586	0.142857	0.0687015	0.61039	0.438858	0.760749
Bacteria;Firmicutes;Clostridia;Clostridiales;Peptostreptococcaceae	0.124565	-0.214286	0.108209	-0.025974	0.438858	0.590612
Bacteria;Firmicutes;Clostridia;Clostridiales;Ruminococcaceae	0.256307	0.142857	0.435397	0.168831	0.645588	0.590612
Bacteria;Firmicutes;Clostridia;Clostridiales;unknown_Clostridiales	0.265547	0.255102	0.92728	-0.12987	0.92728	0.590612
Bacteria;Firmicutes;Clostridia;unknown_Clostridia;unknown_Clostridia	0.457231	0.0714286	0.378324	0.0909091	0.645054	0.677964
Bacteria;Firmicutes;Erysipelotrichia;Erysipelotrichales;Erysipelotrichaceae	0.53141	-0.0204082	0.717584	0	0.791182	0.713001
Bacteria;Firmicutes;Erysipelotrichia;Erysipelotrichales;unknown_Erysipelotrichales	0.165479	-0.0816327	0.217484	-0.0649351	0.519545	0.590612
Bacteria;Firmicutes;Negativicutes;Selenomonadales;Acidaminococcaceae	0.929325	0.183673	0.396154	0.402597	0.645054	1
Bacteria;Firmicutes;Negativicutes;Selenomonadales;Veillonellaceae	0.636906	0.0510204	0.562083	-0.0909091	0.71087	0.760749
Bacteria;Lentisphaerae;Lentisphaeria;Victivallales;Victivallaceae	NA	0	NA	0	NA	NA
Bacteria;Proteobacteria;Alphaproteobacteria;Rhodospirillales;unknown_Rhodospirillales	NA	0	0.366502	0.0909091	0.645054	NA
Bacteria;Proteobacteria;Deltaproteobacteria;Desulfovibrionales;Desulfovibrionaceae	0.288648	0.265306	0.377132	0.142857	0.645054	0.590612
Bacteria;Proteobacteria;Gammaproteobacteria;Enterobacteriales;Enterobacteriaceae	0.396488	0.0714286	0.141472	0.272727	0.438858	0.677964
Bacteria;Proteobacteria;Gammaproteobacteria;Pasteurellales;Pasteurellaceae	NA	0	0.130547	0.363636	0.438858	NA
Bacteria;Proteobacteria;Gammaproteobacteria;Pseudomonadales;Moraxellaceae	0.302174	0.0714286	NA	0	NA	0.590612
Bacteria;Synergistetes;Synergistia;Synergistales;Synergistaceae	NA	0	NA	0	NA	NA
Bacteria;Tenericutes;Mollicutes;Mollicutes_RF39;uncultured_rumen_bacterium	0.26173	0.142857	NA	0	NA	0.590612
Bacteria;Tenericutes;Mollicutes;Mollicutes_RF39;unknown_Mollicutes_RF39	0.239573	0.22449	0.472822	0.194805	0.65585	0.590612
Bacteria;unknown_Bacteria;unknown_Bacteria;unknown_Bacteria;unknown_Bacteria	0.987253	0.0204082	0.837871	-0.194805	0.85782	1
Eukaryota;Vertebrata;Mammalia;unknown_Mammalia;unknown_Mammalia	0.223525	-0.0612245	0.158837	-0.142857	0.438858	0.590612
|δ| < 0.33 corresponds to small,
|δ| < 0.474 corresponds to medium,
otherwise large.

## Sheet: Genus
Taxon	P (baseline vs ABX)	Effect size (baseline vs ABX)	P (baseline vs conclusion)	Effect size (baseline vs conclusion)	FDR (baseline vs conclusion)	FDR (baseline vs ABX)
?;unknown_?;unknown_?;unknown_?;unknown_?;unknown_?	0.597108	-0.0714286	0.163147	-0.142857	0.433359	0.757409
Bacteria;Actinobacteria;Actinobacteria;Actinomycetales;Actinomycetaceae;Actinomyces	NA	0	0.381909	0.0909091	0.595371	NA
Bacteria;Actinobacteria;Actinobacteria;Actinomycetales;Actinomycetaceae;Mobiluncus	0.169877	-0.214286	0.146926	-0.285714	0.433359	0.688561
Bacteria;Actinobacteria;Actinobacteria;Bifidobacteriales;Bifidobacteriaceae;Bifidobacterium	0.12431	-0.142857	0.158837	-0.142857	0.433359	0.688561
Bacteria;Actinobacteria;Actinobacteria;Corynebacteriales;Corynebacteriaceae;Lawsonella	0.12431	-0.142857	0.728502	-0.0519481	0.793881	0.688561
Bacteria;Actinobacteria;Actinobacteria;Micrococcales;Micrococcaceae;Rothia	0.450191	0.0714286	0.233913	0.181818	0.53222	0.688561
Bacteria;Actinobacteria;Coriobacteriia;Coriobacteriales;Coriobacteriaceae;Collinsella	0.396488	0.0714286	0.233241	0.272727	0.53222	0.688561
Bacteria;Actinobacteria;Coriobacteriia;Coriobacteriales;Eggerthellaceae;Gordonibacter	0.396488	0.0714286	NA	0	NA	0.688561
Bacteria;Actinobacteria;Coriobacteriia;Coriobacteriales;Eggerthellaceae;unknown_Eggerthellaceae	0.396488	0.0714286	0.406253	0.0909091	0.595371	0.688561
Bacteria;Bacteroidetes;Bacteroidia;Bacteroidales;Bacteroidaceae;Bacteroides	0.420064	-0.102041	0.572981	-0.142857	0.678804	0.688561
Bacteria;Bacteroidetes;Bacteroidia;Bacteroidales;Bacteroidaceae;unknown_Bacteroidaceae	0.122905	-0.142857	0.158837	-0.142857	0.433359	0.688561
Bacteria;Bacteroidetes;Bacteroidia;Bacteroidales;Barnesiellaceae;Barnesiella	0.459041	-0.102041	0.680981	0	0.761624	0.688561
Bacteria;Bacteroidetes;Bacteroidia;Bacteroidales;Barnesiellaceae;Coprobacter	0.166665	-0.112245	0.0514206	-0.285714	0.433359	0.688561
Bacteria;Bacteroidetes;Bacteroidia;Bacteroidales;Marinifilaceae;Butyricimonas	0.579143	-0.0918367	0.460798	-0.428571	0.630722	0.757409
Bacteria;Bacteroidetes;Bacteroidia;Bacteroidales;Marinifilaceae;Odoribacter	0.404939	-0.0306122	0.139216	0.103896	0.433359	0.688561
Bacteria;Bacteroidetes;Bacteroidia;Bacteroidales;Muribaculaceae;unknown_Muribaculaceae	0.270797	0.142857	NA	0	NA	0.688561
Bacteria;Bacteroidetes;Bacteroidia;Bacteroidales;Porphyromonadaceae;Porphyromonas	0.897862	-0.193878	0.105007	-0.207792	0.433359	0.932705
Bacteria;Bacteroidetes;Bacteroidia;Bacteroidales;Prevotellaceae;Alloprevotella	0.302174	0.0714286	NA	0	NA	0.688561
Bacteria;Bacteroidetes;Bacteroidia;Bacteroidales;Prevotellaceae;Prevotella	0.220571	0.0612245	0.135443	-0.285714	0.433359	0.688561
Bacteria;Bacteroidetes;Bacteroidia;Bacteroidales;Rikenellaceae;Alistipes	0.786623	-0.27551	0.26909	-0.298701	0.550858	0.901931
Bacteria;Bacteroidetes;Bacteroidia;Bacteroidales;Tannerellaceae;Parabacteroides	0.817738	0.102041	0.467476	0.155844	0.630722	0.901931
Bacteria;Bacteroidetes;Bacteroidia;Bacteroidales;unknown_Bacteroidales;unknown_Bacteroidales	0.901614	-0.132653	0.362145	-0.103896	0.595371	0.932705
Bacteria;Bacteroidetes;Bacteroidia;unknown_Bacteroidia;unknown_Bacteroidia;unknown_Bacteroidia	NA	0	0.466447	0.0909091	0.630722	NA
Bacteria;Bacteroidetes;unknown_Bacteroidetes;unknown_Bacteroidetes;unknown_Bacteroidetes;unknown_Bacteroidetes	0.129068	-0.142857	0.163147	-0.142857	0.433359	0.688561
Bacteria;Cyanobacteria;Melainabacteria;Gastranaerophilales;Candidatus_Melainabacteria_bacterium_MEL.A1;unknown_Candidatus_Melainabacteria_bacterium_MEL.A1	0.338878	0.142857	NA	0	NA	0.688561
Bacteria;Cyanobacteria;Melainabacteria;Gastranaerophilales;unknown_Gastranaerophilales;unknown_Gastranaerophilales	0.391342	-0.153061	0.16113	-0.207792	0.433359	0.688561
Bacteria;Epsilonbacteraeota;Campylobacteria;Campylobacterales;Campylobacteraceae;Campylobacter	0.275634	-0.214286	0.147357	-0.285714	0.433359	0.688561
Bacteria;Firmicutes;Bacilli;Bacillales;Family_XI;Gemella	NA	0	0.381909	0.0909091	0.595371	NA
Bacteria;Firmicutes;Bacilli;Bacillales;Staphylococcaceae;Staphylococcus	0.12431	-0.142857	0.158837	-0.142857	0.433359	0.688561
Bacteria;Firmicutes;Bacilli;Lactobacillales;Aerococcaceae;Abiotrophia	0.569265	-0.0714286	0.158837	-0.142857	0.433359	0.757409
Bacteria;Firmicutes;Bacilli;Lactobacillales;Carnobacteriaceae;Granulicatella	0.371823	-0.0816327	0.616337	0.012987	0.698515	0.688561
Bacteria;Firmicutes;Bacilli;Lactobacillales;Enterococcaceae;Enterococcus	0.232568	0.0612245	0.158837	-0.142857	0.433359	0.688561
Bacteria;Firmicutes;Bacilli;Lactobacillales;Lactobacillaceae;Lactobacillus	0.569265	-0.0714286	0.400322	0.0649351	0.595371	0.757409
Bacteria;Firmicutes;Bacilli;Lactobacillales;Streptococcaceae;Streptococcus	0.230822	0.336735	0.272189	0.25974	0.550858	0.688561
Bacteria;Firmicutes;Clostridia;Clostridiales;Christensenellaceae;unknown_Christensenellaceae	0.457231	0.0714286	NA	0	NA	0.688561
Bacteria;Firmicutes;Clostridia;Clostridiales;Defluviitaleaceae;Defluviitaleaceae_UCG-011	NA	0	0.381909	0.0909091	0.595371	NA
Bacteria;Firmicutes;Clostridia;Clostridiales;Family_XI;Ezakiella	0.940846	-0.193878	0.926135	-0.0779221	0.926135	0.940846
Bacteria;Firmicutes;Clostridia;Clostridiales;Family_XI;Finegoldia	0.0878569	-0.285714	0.133213	-0.285714	0.433359	0.688561
Bacteria;Firmicutes;Clostridia;Clostridiales;Family_XI;Peptoniphilus	0.371823	-0.0816327	0.158837	-0.142857	0.433359	0.688561
Bacteria;Firmicutes;Clostridia;Clostridiales;Family_XIII;Family_XIII_UCG-001	NA	0	0.381909	0.0909091	0.595371	NA
Bacteria;Firmicutes;Clostridia;Clostridiales;Family_XIII;S5-A14a	0.820631	0.0714286	NA	0	NA	0.901931
Bacteria;Firmicutes;Clostridia;Clostridiales;Lachnospiraceae;Agathobacter	0.830446	0.0612245	0.497779	0.142857	0.641079	0.901931
Bacteria;Firmicutes;Clostridia;Clostridiales;Lachnospiraceae;Anaerostipes	0.297259	-0.0816327	0.163147	-0.142857	0.433359	0.688561
Bacteria;Firmicutes;Clostridia;Clostridiales;Lachnospiraceae;Blautia	0.724198	0.0306122	0.574987	0.194805	0.678804	0.880781
Bacteria;Firmicutes;Clostridia;Clostridiales;Lachnospiraceae;Dorea	0.458426	0.0714286	NA	0	NA	0.688561
Bacteria;Firmicutes;Clostridia;Clostridiales;Lachnospiraceae;Eisenbergiella	0.297259	0.142857	0.329136	0.181818	0.595371	0.688561
Bacteria;Firmicutes;Clostridia;Clostridiales;Lachnospiraceae;Fusicatenibacter	0.203747	0.244898	0.0637585	0.662338	0.433359	0.688561
Bacteria;Firmicutes;Clostridia;Clostridiales;Lachnospiraceae;GCA-900066575	0.457231	0.0714286	NA	0	NA	0.688561
Bacteria;Firmicutes;Clostridia;Clostridiales;Lachnospiraceae;Hungatella	0.0175327	-0.285714	0.0156815	-0.285714	0.433359	0.688561
Bacteria;Firmicutes;Clostridia;Clostridiales;Lachnospiraceae;Lachnoclostridium	0.783369	-0.0306122	0.0316992	-0.363636	0.433359	0.901931
Bacteria;Firmicutes;Clostridia;Clostridiales;Lachnospiraceae;Lachnospira	0.368554	0.0204082	0.386061	0.363636	0.595371	0.688561
Bacteria;Firmicutes;Clostridia;Clostridiales;Lachnospiraceae;Lachnospiraceae_UCG-001	0.457231	0.0714286	0.144485	0.272727	0.433359	0.688561
Bacteria;Firmicutes;Clostridia;Clostridiales;Lachnospiraceae;Lachnospiraceae_UCG-004	0.458426	0.0714286	0.202278	0.181818	0.491246	0.688561
Bacteria;Firmicutes;Clostridia;Clostridiales;Lachnospiraceae;Lachnospiraceae_UCG-010	NA	0	NA	0	NA	NA
Bacteria;Firmicutes;Clostridia;Clostridiales;Lachnospiraceae;Marvinbryantia	NA	0	NA	0	NA	NA
Bacteria;Firmicutes;Clostridia;Clostridiales;Lachnospiraceae;Roseburia	0.214288	0.0918367	0.250456	0.727273	0.53222	0.688561
Bacteria;Firmicutes;Clostridia;Clostridiales;Lachnospiraceae;Sellimonas	0.457231	0.0714286	0.329136	0.181818	0.595371	0.688561
Bacteria;Firmicutes;Clostridia;Clostridiales;Lachnospiraceae;unknown_Lachnospiraceae	0.339031	0.285714	0.0921449	0.688312	0.433359	0.688561
Bacteria;Firmicutes;Clostridia;Clostridiales;Peptostreptococcaceae;Clostridioides	0.242772	-0.163265	0.493615	0.0519481	0.641079	0.688561
Bacteria;Firmicutes;Clostridia;Clostridiales;Peptostreptococcaceae;Peptostreptococcus	0.597512	-0.0714286	0.183594	-0.142857	0.458984	0.757409
Bacteria;Firmicutes;Clostridia;Clostridiales;Peptostreptococcaceae;Romboutsia	0.309897	-0.0816327	0.157908	0.311688	0.433359	0.688561
Bacteria;Firmicutes;Clostridia;Clostridiales;Ruminococcaceae;Anaerofilum	0.831781	0.0816327	0.597187	-0.0519481	0.685958	0.901931
Bacteria;Firmicutes;Clostridia;Clostridiales;Ruminococcaceae;Anaerotruncus	NA	0	NA	0	NA	NA
Bacteria;Firmicutes;Clostridia;Clostridiales;Ruminococcaceae;Angelakisella	0.344272	0.142857	NA	0	NA	0.688561
Bacteria;Firmicutes;Clostridia;Clostridiales;Ruminococcaceae;Butyricicoccus	0.865251	0.0204082	0.241737	0.246753	0.53222	0.916148
Bacteria;Firmicutes;Clostridia;Clostridiales;Ruminococcaceae;Candidatus_Soleaferrea	0.743104	0.0102041	0.183594	-0.142857	0.458984	0.891725
Bacteria;Firmicutes;Clostridia;Clostridiales;Ruminococcaceae;DTU089	0.473249	0.214286	0.406253	0.0909091	0.595371	0.698236
Bacteria;Firmicutes;Clostridia;Clostridiales;Ruminococcaceae;Faecalibacterium	0.679756	0.0714286	0.432507	0.142857	0.623103	0.849695
Bacteria;Firmicutes;Clostridia;Clostridiales;Ruminococcaceae;Fournierella	0.129068	-0.142857	0.527486	0.038961	0.649801	0.688561
Bacteria;Firmicutes;Clostridia;Clostridiales;Ruminococcaceae;Harryflintia	NA	0	NA	0	NA	NA
Bacteria;Firmicutes;Clostridia;Clostridiales;Ruminococcaceae;Hydrogenoanaerobacterium	NA	0	NA	0	NA	NA
Bacteria;Firmicutes;Clostridia;Clostridiales;Ruminococcaceae;Negativibacillus	0.457231	0.0714286	NA	0	NA	0.688561
Bacteria;Firmicutes;Clostridia;Clostridiales;Ruminococcaceae;Oscillibacter	0.699564	0.306122	0.562102	-0.038961	0.678804	0.862476
Bacteria;Firmicutes;Clostridia;Clostridiales;Ruminococcaceae;Phocea	0.597102	-0.0714286	0.745243	-0.0519481	0.793963	0.757409
Bacteria;Firmicutes;Clostridia;Clostridiales;Ruminococcaceae;Ruminiclostridium	0.457231	0.0714286	NA	0	NA	0.688561
Bacteria;Firmicutes;Clostridia;Clostridiales;Ruminococcaceae;Ruminococcaceae_UCG-002	0.779235	-0.255102	0.336999	-0.038961	0.595371	0.901931
Bacteria;Firmicutes;Clostridia;Clostridiales;Ruminococcaceae;Ruminococcaceae_UCG-004	0.442895	0.132653	0.454021	0.0649351	0.630722	0.688561
Bacteria;Firmicutes;Clostridia;Clostridiales;Ruminococcaceae;Ruminococcaceae_UCG-005	0.18373	-0.336735	0.246606	-0.0519481	0.53222	0.688561
Bacteria;Firmicutes;Clostridia;Clostridiales;Ruminococcaceae;Ruminococcaceae_UCG-010	0.420865	-0.153061	0.771319	-0.155844	0.809409	0.688561
Bacteria;Firmicutes;Clostridia;Clostridiales;Ruminococcaceae;Ruminococcaceae_UCG-011	NA	0	NA	0	NA	NA
Bacteria;Firmicutes;Clostridia;Clostridiales;Ruminococcaceae;Ruminococcaceae_UCG-013	0.923868	-0.0204082	0.519073	-0.12987	0.649801	0.940846
Bacteria;Firmicutes;Clostridia;Clostridiales;Ruminococcaceae;Ruminococcaceae_UCG-014	0.540102	-0.397959	0.0910616	-0.493506	0.433359	0.757409
Bacteria;Firmicutes;Clostridia;Clostridiales;Ruminococcaceae;UBA1819	0.308739	0.173469	0.48936	0	0.641079	0.688561
Bacteria;Firmicutes;Clostridia;Clostridiales;Ruminococcaceae;unknown_Ruminococcaceae	0.25301	0.22449	0.703496	-0.168831	0.776587	0.688561
Bacteria;Firmicutes;Clostridia;Clostridiales;unknown_Clostridiales;unknown_Clostridiales	0.168959	0.377551	0.881676	-0.25974	0.892172	0.688561
Bacteria;Firmicutes;Clostridia;unknown_Clostridia;unknown_Clostridia;unknown_Clostridia	0.578334	-0.0714286	0.163147	-0.142857	0.433359	0.757409
Bacteria;Firmicutes;Erysipelotrichi;Erysipelotrichales;Erysipelotrichaceae;[Eubacterium]	NA	0	0.366502	0.0909091	0.595371	NA
Bacteria;Firmicutes;Erysipelotrichia;Erysipelotrichales;Erysipelotrichaceae;Coprobacillus	0.458426	0.0714286	0.378324	0.0909091	0.595371	0.688561
Bacteria;Firmicutes;Erysipelotrichia;Erysipelotrichales;Erysipelotrichaceae;Dielma	NA	0	NA	0	NA	NA
Bacteria;Firmicutes;Erysipelotrichia;Erysipelotrichales;Erysipelotrichaceae;Erysipelatoclostridium	0.492553	-0.0204082	0.8194	0.038961	0.844467	0.714996
Bacteria;Firmicutes;Erysipelotrichia;Erysipelotrichales;Erysipelotrichaceae;Erysipelotrichaceae_UCG-003	0.82225	0	0.747259	-0.0519481	0.793963	0.901931
Bacteria;Firmicutes;Erysipelotrichia;Erysipelotrichales;Erysipelotrichaceae;Firmicutes_bacterium_CAG:345	0.078851	-0.214286	0.103935	-0.285714	0.433359	0.688561
Bacteria;Firmicutes;Erysipelotrichia;Erysipelotrichales;unknown_Erysipelotrichales;unknown_Erysipelotrichales	0.137998	-0.173469	0.120011	-0.220779	0.433359	0.688561
Bacteria;Firmicutes;Negativicutes;Selenomonadales;Acidaminococcaceae;Phascolarctobacterium	0.936033	0.204082	0.824597	0.285714	0.844467	0.940846
Bacteria;Firmicutes;Negativicutes;Selenomonadales;Veillonellaceae;Veillonella	0.510829	0.0714286	0.525415	-0.103896	0.649801	0.729755
Bacteria;Firmicutes;Negativicutes;Selenomonadales;Veillonellaceae;unknown_Veillonellaceae	0.450191	0.0714286	NA	0	NA	0.688561
Bacteria;Firmicutes;unknown_Firmicutes;unknown_Firmicutes;unknown_Firmicutes;unknown_Firmicutes	NA	0	NA	0	NA	NA
Bacteria;Lentisphaerae;Lentisphaeria;Victivallales;Victivallaceae;Victivallis	NA	0	NA	0	NA	NA
Bacteria;Proteobacteria;Alphaproteobacteria;Rhodospirillales;unknown_Rhodospirillales;unknown_Rhodospirillales	0.457231	0.0714286	0.366502	0.0909091	0.595371	0.688561
Bacteria;Proteobacteria;Deltaproteobacteria;Desulfovibrionales;Desulfovibrionaceae;Desulfovibrio	0.332728	0.357143	0.113371	0.545455	0.433359	0.688561
Bacteria;Proteobacteria;Gammaproteobacteria;Enterobacteriales;Enterobacteriaceae;Escherichia-Shigella	NA	0	0.114216	0.272727	0.433359	NA
Bacteria;Proteobacteria;Gammaproteobacteria;Pasteurellales;Pasteurellaceae;Haemophilus	NA	0	0.124202	0.363636	0.433359	NA
Bacteria;Proteobacteria;Gammaproteobacteria;Pseudomonadales;Moraxellaceae;Acinetobacter	0.302174	0.0714286	NA	0	NA	0.688561
Bacteria;Proteobacteria;Gammaproteobacteria;Xanthomonadales;Xanthomonadaceae;Pseudoxanthomonas	0.150608	-0.0816327	0.158837	-0.142857	0.433359	0.688561
Bacteria;Synergistetes;Synergistia;Synergistales;Synergistaceae;Pyramidobacter	NA	0	NA	0	NA	NA
Bacteria;Tenericutes;Mollicutes;Mollicutes_RF39;unknown_Mollicutes_RF39;unknown_Mollicutes_RF39	0.267798	-0.0612245	0.592137	0.0909091	0.685958	0.688561
Bacteria;Verrucomicrobia;Verrucomicrobiae;Verrucomicrobiales;Akkermansiaceae;Akkermansia	NA	NA	NA	0	NA	NA
Bacteria;unknown_Bacteria;unknown_Bacteria;unknown_Bacteria;unknown_Bacteria;unknown_Bacteria	0.853916	0.0204082	0.373079	-0.142857	0.595371	0.91491
Eukaryota;Vertebrata;Mammalia;unknown_Mammalia;unknown_Mammalia;unknown_Mammalia	0.251314	-0.0612245	0.158837	-0.142857	0.433359	0.688561
|δ| < 0.33 corresponds to small,
|δ| < 0.474 corresponds to medium,
otherwise large.

## Sheet: Species
Taxon	P (baseline vs ABX)	Effect size (baseline vs ABX)	P (baseline vs conclusion)	Effect size (baseline vs conclusion)	FDR (baseline vs conclusion)	FDR (baseline vs ABX)
?;unknown_?;unknown_?;unknown_?;unknown_?;unknown_?;unknown_?	0.597108	-0.0714286	0.163147	-0.142857	0.554596	0.752048
Bacteria;Actinobacteria;Actinobacteria;Actinomycetales;Actinomycetaceae;Actinomyces;Actinomyces_Actinomyces_turicensis_ACS-279-V-Col4	0.820631	0.0714286	0.381909	0.0909091	0.601032	0.868435
Bacteria;Actinobacteria;Actinobacteria;Actinomycetales;Actinomycetaceae;Actinomyces;Actinomyces_sp.	0.820631	0.0714286	NA	0	NA	0.868435
Bacteria;Actinobacteria;Actinobacteria;Actinomycetales;Actinomycetaceae;Mobiluncus;Mobiluncus_sp.	0.160451	-0.214286	0.144977	-0.285714	0.554596	0.666246
Bacteria;Actinobacteria;Actinobacteria;Corynebacteriales;Corynebacteriaceae;Lawsonella;Lawsonella_sp.	0.12431	-0.142857	0.693071	-0.038961	0.787912	0.666246
Bacteria;Actinobacteria;Actinobacteria;Micrococcales;Micrococcaceae;Rothia;Rothia_Rothia_aeria	NA	0	0.233913	0.181818	0.554596	NA
Bacteria;Actinobacteria;Coriobacteriia;Coriobacteriales;Coriobacteriaceae;Collinsella;Collinsella_sp.	0.836129	-0.193878	0.475515	0.012987	0.620142	0.876328
Bacteria;Actinobacteria;Coriobacteriia;Coriobacteriales;Eggerthellaceae;Gordonibacter;Gordonibacter_sp.	1	-0.0612245	0.163147	-0.142857	0.554596	1
Bacteria;Actinobacteria;Coriobacteriia;Coriobacteriales;Eggerthellaceae;unknown_Eggerthellaceae;unknown_Eggerthellaceae	0.396488	0.0714286	0.240617	0.181818	0.554596	0.666246
Bacteria;Bacteroidetes;Bacteroidia;Bacteroidales;Bacteroidaceae;Bacteroides;Bacteroides_Bacteroides_dorei	0.210872	0.377551	0.719773	0.220779	0.802839	0.666246
Bacteria;Bacteroidetes;Bacteroidia;Bacteroidales;Bacteroidaceae;Bacteroides;Bacteroides_Bacteroides_uniformis	0.1918	-0.122449	0.450659	-0.233766	0.620142	0.666246
Bacteria;Bacteroidetes;Bacteroidia;Bacteroidales;Bacteroidaceae;Bacteroides;Bacteroides_gut_metagenome	0.170966	0.0816327	0.464051	-0.038961	0.620142	0.666246
Bacteria;Bacteroidetes;Bacteroidia;Bacteroidales;Bacteroidaceae;Bacteroides;Bacteroides_sp.	0.230784	-0.183673	0.00509559	-0.337662	0.550324	0.666246
Bacteria;Bacteroidetes;Bacteroidia;Bacteroidales;Bacteroidaceae;Bacteroides;Bacteroides_uncultured_organism	0.560404	0.408163	0.787575	0.194805	0.820502	0.744927
Bacteria;Bacteroidetes;Bacteroidia;Bacteroidales;Bacteroidaceae;unknown_Bacteroidaceae;unknown_Bacteroidaceae	NA	0	NA	0	NA	NA
Bacteria;Bacteroidetes;Bacteroidia;Bacteroidales;Barnesiellaceae;Barnesiella;Barnesiella_sp.	0.405351	-0.0204082	0.491051	0.207792	0.623273	0.666246
Bacteria;Bacteroidetes;Bacteroidia;Bacteroidales;Barnesiellaceae;Coprobacter;Coprobacter_sp.	0.0897914	-0.22449	0.0593849	-0.428571	0.554596	0.666246
Bacteria;Bacteroidetes;Bacteroidia;Bacteroidales;Marinifilaceae;Butyricimonas;Butyricimonas_sp.	0.547312	0.0612245	0.0555844	-0.285714	0.554596	0.736506
Bacteria;Bacteroidetes;Bacteroidia;Bacteroidales;Marinifilaceae;Butyricimonas;Butyricimonas_uncultured_organism	0.122905	0.214286	NA	0	NA	0.666246
Bacteria;Bacteroidetes;Bacteroidia;Bacteroidales;Marinifilaceae;Odoribacter;Odoribacter_sp.	0.192351	0.0408163	0.100192	0.103896	0.554596	0.666246
Bacteria;Bacteroidetes;Bacteroidia;Bacteroidales;Muribaculaceae;unknown_Muribaculaceae;unknown_Muribaculaceae	0.240241	0.0102041	0.745952	-0.0519481	0.805628	0.666246
Bacteria;Bacteroidetes;Bacteroidia;Bacteroidales;Porphyromonadaceae;Porphyromonas;Porphyromonas_Porphyromonas_bennonis	0.754803	-0.0612245	0.183594	-0.142857	0.554596	0.84818
Bacteria;Bacteroidetes;Bacteroidia;Bacteroidales;Porphyromonadaceae;Porphyromonas;Porphyromonas_sp.	0.742896	-0.0612245	0.191431	-0.0649351	0.554596	0.84818
Bacteria;Bacteroidetes;Bacteroidia;Bacteroidales;Prevotellaceae;Alloprevotella;Alloprevotella_sp.	0.302174	0.0714286	NA	0	NA	0.666246
Bacteria;Bacteroidetes;Bacteroidia;Bacteroidales;Prevotellaceae;Prevotella;Prevotella_Prevotella_buccalis	0.348598	-0.0918367	0.112081	-0.285714	0.554596	0.666246
Bacteria;Bacteroidetes;Bacteroidia;Bacteroidales;Prevotellaceae;Prevotella;Prevotella_sp.	0.136069	-0.163265	0.172342	-0.285714	0.554596	0.666246
Bacteria;Bacteroidetes;Bacteroidia;Bacteroidales;Rikenellaceae;Alistipes;Alistipes_sp.	0.668363	-0.306122	0.198359	-0.311688	0.554596	0.78335
Bacteria;Bacteroidetes;Bacteroidia;Bacteroidales;Tannerellaceae;Parabacteroides;Parabacteroides_gut_metagenome	1	-0.0102041	0.785374	0.103896	0.820502	1
Bacteria;Bacteroidetes;Bacteroidia;Bacteroidales;Tannerellaceae;Parabacteroides;Parabacteroides_sp.	0.976228	-0.0612245	0.498792	-0.038961	0.623273	0.999894
Bacteria;Bacteroidetes;Bacteroidia;Bacteroidales;unknown_Bacteroidales;unknown_Bacteroidales;unknown_Bacteroidales	0.68109	0.255102	0.167692	0.103896	0.554596	0.789774
Bacteria;Bacteroidetes;Bacteroidia;Cytophagales;Microscillaceae;unknown_Microscillaceae;unknown_Microscillaceae	0.129068	-0.142857	0.163147	-0.142857	0.554596	0.666246
Bacteria;Cyanobacteria;Melainabacteria;Gastranaerophilales;Candidatus_Melainabacteria_bacterium_MEL.A1;unknown_Candidatus_Melainabacteria_bacterium_MEL.A1;unknown_Candidatus_Melainabacteria_bacterium_MEL.A1	0.404992	0.0918367	0.163147	-0.142857	0.554596	0.666246
Bacteria;Cyanobacteria;Melainabacteria;Gastranaerophilales;unknown_Gastranaerophilales;unknown_Gastranaerophilales;unknown_Gastranaerophilales	0.329532	-0.0510204	0.0514206	-0.285714	0.554596	0.666246
Bacteria;Epsilonbacteraeota;Campylobacteria;Campylobacterales;Campylobacteraceae;Campylobacter;Campylobacter_sp.	0.298086	-0.214286	0.152444	-0.285714	0.554596	0.666246
Bacteria;Firmicutes;Bacilli;Bacillales;Family_XI;Gemella;Gemella_sp.	NA	0	0.378938	0.181818	0.601032	NA
Bacteria;Firmicutes;Bacilli;Lactobacillales;Aerococcaceae;Abiotrophia;Abiotrophia_sp.	0.338283	0.142857	NA	0	NA	0.666246
Bacteria;Firmicutes;Bacilli;Lactobacillales;Carnobacteriaceae;Granulicatella;Granulicatella_sp.	0.12431	-0.142857	0.878207	0.025974	0.886414	0.666246
Bacteria;Firmicutes;Bacilli;Lactobacillales;Enterococcaceae;Enterococcus;Enterococcus_sp.	0.240125	0	0.158837	-0.142857	0.554596	0.666246
Bacteria;Firmicutes;Bacilli;Lactobacillales;Lactobacillaceae;Lactobacillus;Lactobacillus_Lactobacillus_helveticus_R0052	NA	0	0.476591	0.0909091	0.620142	NA
Bacteria;Firmicutes;Bacilli;Lactobacillales;Lactobacillaceae;Lactobacillus;Lactobacillus_sp.	NA	0	0.256091	0.181818	0.576205	NA
Bacteria;Firmicutes;Bacilli;Lactobacillales;Leuconostocaceae;Leuconostoc;Leuconostoc_uncultured_Leuconostoc_sp.	0.450191	0.0714286	NA	0	NA	0.666246
Bacteria;Firmicutes;Bacilli;Lactobacillales;Streptococcaceae;Lactococcus;Lactococcus_sp.	NA	0	NA	0	NA	NA
Bacteria;Firmicutes;Bacilli;Lactobacillales;Streptococcaceae;Streptococcus;Streptococcus_Streptococcus_parasanguinis_CC87K	0.521578	-0.0204082	0.790113	0.103896	0.820502	0.736506
Bacteria;Firmicutes;Bacilli;Lactobacillales;Streptococcaceae;Streptococcus;Streptococcus_Streptococcus_sobrinus	0.297259	-0.0816327	0.413208	-0.0649351	0.60306	0.666246
Bacteria;Firmicutes;Bacilli;Lactobacillales;Streptococcaceae;Streptococcus;Streptococcus_sp.	0.527689	0.244898	0.241352	0.12987	0.554596	0.736506
Bacteria;Firmicutes;Clostridia;Clostridiales;Christensenellaceae;Catabacter;Catabacter_Christensenella_timonensis	0.458426	0.0714286	NA	0	NA	0.666246
Bacteria;Firmicutes;Clostridia;Clostridiales;Christensenellaceae;Christensenella;Christensenella_Christensenella_minuta	NA	0	0.378324	0.0909091	0.601032	NA
Bacteria;Firmicutes;Clostridia;Clostridiales;Christensenellaceae;unknown_Christensenellaceae;unknown_Christensenellaceae	0.6643	0.0714286	0.163147	-0.142857	0.554596	0.78335
Bacteria;Firmicutes;Clostridia;Clostridiales;Defluviitaleaceae;Defluviitaleaceae_UCG-011;Defluviitaleaceae_UCG-011_sp.	0.129068	-0.142857	0.541784	-0.038961	0.657446	0.666246
Bacteria;Firmicutes;Clostridia;Clostridiales;Eubacteriaceae;Eubacterium;Eubacterium_Eubacterium_limosum_KIST612	0.457231	0.0714286	0.381909	0.0909091	0.601032	0.666246
Bacteria;Firmicutes;Clostridia;Clostridiales;Family_XI;Finegoldia;Finegoldia_sp.	0.234334	-0.0816327	0.3225	-0.0649351	0.601032	0.666246
Bacteria;Firmicutes;Clostridia;Clostridiales;Family_XI;Peptoniphilus;Peptoniphilus_sp.	0.288223	-0.214286	0.148601	-0.207792	0.554596	0.666246
Bacteria;Firmicutes;Clostridia;Clostridiales;Family_XIII;Family_XIII_UCG-001;Family_XIII_UCG-001_sp.	NA	0	NA	0	NA	NA
Bacteria;Firmicutes;Clostridia;Clostridiales;Lachnospiraceae;Agathobacter;Agathobacter_Eubacterium_ramulus	0.541343	0.0102041	0.426347	0.246753	0.608374	0.736506
Bacteria;Firmicutes;Clostridia;Clostridiales;Lachnospiraceae;Blautia;Blautia_Clostridia_bacterium_UC5.1-1D4	0.419194	0.142857	NA	0	NA	0.666246
Bacteria;Firmicutes;Clostridia;Clostridiales;Lachnospiraceae;Blautia;Blautia_metagenome	0.458426	0.0714286	0.215734	0.454545	0.554596	0.666246
Bacteria;Firmicutes;Clostridia;Clostridiales;Lachnospiraceae;Blautia;Blautia_sp.	0.1082	-0.0816327	0.685308	0.311688	0.787375	0.666246
Bacteria;Firmicutes;Clostridia;Clostridiales;Lachnospiraceae;Dorea;Dorea_sp.	0.129068	-0.142857	0.163147	-0.142857	0.554596	0.666246
Bacteria;Firmicutes;Clostridia;Clostridiales;Lachnospiraceae;Eisenbergiella;Eisenbergiella_sp.	0.457231	0.0714286	0.378324	0.0909091	0.601032	0.666246
Bacteria;Firmicutes;Clostridia;Clostridiales;Lachnospiraceae;Fusicatenibacter;Fusicatenibacter_sp.	0.427597	-0.0306122	0.151568	0.545455	0.554596	0.666246
Bacteria;Firmicutes;Clostridia;Clostridiales;Lachnospiraceae;Fusicatenibacter;Fusicatenibacter_uncultured_Firmicutes_bacterium	0.0811243	0.459184	0.0567809	0.532468	0.554596	0.666246
Bacteria;Firmicutes;Clostridia;Clostridiales;Lachnospiraceae;Howardella;Howardella_sp.	0.820631	0.0714286	0.366502	0.0909091	0.601032	0.868435
Bacteria;Firmicutes;Clostridia;Clostridiales;Lachnospiraceae;Hungatella;Hungatella_Hungatella_hathewayi	0.582529	-0.0714286	0.163147	-0.142857	0.554596	0.752048
Bacteria;Firmicutes;Clostridia;Clostridiales;Lachnospiraceae;Lachnoclostridium;Lachnoclostridium_human_gut_metagenome	0.611986	0.0714286	0.728502	-0.0519481	0.802839	0.756425
Bacteria;Firmicutes;Clostridia;Clostridiales;Lachnospiraceae;Lachnoclostridium;Lachnoclostridium_sp.	0.530215	-0.102041	0.0514006	-0.441558	0.554596	0.736506
Bacteria;Firmicutes;Clostridia;Clostridiales;Lachnospiraceae;Lachnospira;Lachnospira_sp.	0.38263	0.0918367	0.325676	0.545455	0.601032	0.666246
Bacteria;Firmicutes;Clostridia;Clostridiales;Lachnospiraceae;Lachnospiraceae_UCG-001;Lachnospiraceae_UCG-001_metagenome	0.302174	0.0714286	0.219402	0.181818	0.554596	0.666246
Bacteria;Firmicutes;Clostridia;Clostridiales;Lachnospiraceae;Lachnospiraceae_UCG-001;Lachnospiraceae_UCG-001_sp.	NA	0	0.466447	0.0909091	0.620142	NA
Bacteria;Firmicutes;Clostridia;Clostridiales;Lachnospiraceae;Lachnospiraceae_UCG-004;Lachnospiraceae_UCG-004_sp.	0.597512	-0.0714286	0.0544702	0.363636	0.554596	0.752048
Bacteria;Firmicutes;Clostridia;Clostridiales;Lachnospiraceae;Lachnospiraceae_UCG-010;Lachnospiraceae_UCG-010_sp.	NA	0	NA	0	NA	NA
Bacteria;Firmicutes;Clostridia;Clostridiales;Lachnospiraceae;Roseburia;Roseburia_Roseburia_faecis	NA	0	NA	0	NA	NA
Bacteria;Firmicutes;Clostridia;Clostridiales;Lachnospiraceae;Roseburia;Roseburia_sp.	0.24274	0.214286	0.240422	0.636364	0.554596	0.666246
Bacteria;Firmicutes;Clostridia;Clostridiales;Lachnospiraceae;Roseburia;Roseburia_uncultured_organism	NA	0	NA	0	NA	NA
Bacteria;Firmicutes;Clostridia;Clostridiales;Lachnospiraceae;Sellimonas;Sellimonas_uncultured_Firmicutes_bacterium	0.457968	0.142857	0.381909	0.0909091	0.601032	0.666246
Bacteria;Firmicutes;Clostridia;Clostridiales;Lachnospiraceae;Tyzzerella;Tyzzerella_sp.	NA	0	NA	0	NA	NA
Bacteria;Firmicutes;Clostridia;Clostridiales;Lachnospiraceae;unknown_Lachnospiraceae;unknown_Lachnospiraceae	0.258448	0.357143	0.0613132	0.688312	0.554596	0.666246
Bacteria;Firmicutes;Clostridia;Clostridiales;Peptostreptococcaceae;Clostridioides;Clostridioides_sp.	0.800478	0	0.428115	0.0909091	0.608374	0.868435
Bacteria;Firmicutes;Clostridia;Clostridiales;Peptostreptococcaceae;Romboutsia;Romboutsia_sp.	0.0643878	-0.234694	0.502081	0.0649351	0.623273	0.666246
Bacteria;Firmicutes;Clostridia;Clostridiales;Peptostreptococcaceae;unknown_Peptostreptococcaceae;unknown_Peptostreptococcaceae	0.457968	0.142857	NA	0	NA	0.666246
Bacteria;Firmicutes;Clostridia;Clostridiales;Ruminococcaceae;Anaerofilum;Anaerofilum_metagenome	0.445551	0.142857	0.406253	0.0909091	0.601032	0.666246
Bacteria;Firmicutes;Clostridia;Clostridiales;Ruminococcaceae;Angelakisella;Angelakisella_Angelakisella_massiliensis	0.331257	0.142857	NA	0	NA	0.666246
Bacteria;Firmicutes;Clostridia;Clostridiales;Ruminococcaceae;Butyricicoccus;Butyricicoccus_sp.	0.778035	0.122449	0.300508	0.207792	0.601032	0.865366
Bacteria;Firmicutes;Clostridia;Clostridiales;Ruminococcaceae;Candidatus_Soleaferrea;Candidatus_Soleaferrea_Bittarella_massiliensis	0.307163	0.285714	NA	0	NA	0.666246
Bacteria;Firmicutes;Clostridia;Clostridiales;Ruminococcaceae;Candidatus_Soleaferrea;Candidatus_Soleaferrea_uncultured_organism	NA	0	0.381909	0.0909091	0.601032	NA
Bacteria;Firmicutes;Clostridia;Clostridiales;Ruminococcaceae;DTU089;DTU089_sp.	0.455797	0.214286	0.406253	0.0909091	0.601032	0.666246
Bacteria;Firmicutes;Clostridia;Clostridiales;Ruminococcaceae;Faecalibacterium;Faecalibacterium_sp.	0.621608	-0.0714286	0.339677	0.155844	0.601032	0.756425
Bacteria;Firmicutes;Clostridia;Clostridiales;Ruminococcaceae;Faecalibacterium;Faecalibacterium_uncultured_organism	0.266311	0.142857	NA	0	NA	0.666246
Bacteria;Firmicutes;Clostridia;Clostridiales;Ruminococcaceae;Fournierella;Fournierella_bacterium_ic1340	0.396487	0.0714286	0.223003	0.181818	0.554596	0.666246
Bacteria;Firmicutes;Clostridia;Clostridiales;Ruminococcaceae;Negativibacillus;Negativibacillus_sp.	0.457231	0.0714286	NA	0	NA	0.666246
Bacteria;Firmicutes;Clostridia;Clostridiales;Ruminococcaceae;Oscillibacter;Oscillibacter_uncultured_organism	0.600259	0.367347	0.591581	-0.038961	0.694465	0.752048
Bacteria;Firmicutes;Clostridia;Clostridiales;Ruminococcaceae;Papillibacter;Papillibacter_sp.	0.981547	0	0.163147	-0.142857	0.554596	0.999894
Bacteria;Firmicutes;Clostridia;Clostridiales;Ruminococcaceae;Phocea;Phocea_Phocea_massiliensis	0.21586	0.142857	0.466447	0.0909091	0.620142	0.666246
Bacteria;Firmicutes;Clostridia;Clostridiales;Ruminococcaceae;Ruminiclostridium;Ruminiclostridium_sp.	NA	0	NA	0	NA	NA
Bacteria;Firmicutes;Clostridia;Clostridiales;Ruminococcaceae;Ruminococcaceae_UCG-002;Ruminococcaceae_UCG-002_gut_metagenome	0.456314	0.132653	0.365478	0.233766	0.601032	0.666246
Bacteria;Firmicutes;Clostridia;Clostridiales;Ruminococcaceae;Ruminococcaceae_UCG-002;Ruminococcaceae_UCG-002_sp.	0.263032	-0.0204082	0.209144	0.220779	0.554596	0.666246
Bacteria;Firmicutes;Clostridia;Clostridiales;Ruminococcaceae;Ruminococcaceae_UCG-002;Ruminococcaceae_UCG-002_uncultured_rumen_bacterium	0.284158	0.122449	0.954684	-0.038961	0.954684	0.666246
Bacteria;Firmicutes;Clostridia;Clostridiales;Ruminococcaceae;Ruminococcaceae_UCG-004;Ruminococcaceae_UCG-004_sp.	0.263155	0.142857	0.207054	0.454545	0.554596	0.666246
Bacteria;Firmicutes;Clostridia;Clostridiales;Ruminococcaceae;Ruminococcaceae_UCG-005;Ruminococcaceae_UCG-005_sp.	0.923292	-0.0102041	0.161613	0.467532	0.554596	0.958465
Bacteria;Firmicutes;Clostridia;Clostridiales;Ruminococcaceae;Ruminococcaceae_UCG-010;Ruminococcaceae_UCG-010_gut_metagenome	0.129068	-0.142857	0.163147	-0.142857	0.554596	0.666246
Bacteria;Firmicutes;Clostridia;Clostridiales;Ruminococcaceae;Ruminococcaceae_UCG-010;Ruminococcaceae_UCG-010_sp.	0.457231	0.0714286	0.406253	0.0909091	0.601032	0.666246
Bacteria;Firmicutes;Clostridia;Clostridiales;Ruminococcaceae;Ruminococcaceae_UCG-010;Ruminococcaceae_UCG-010_uncultured_Ruminococcaceae_bacterium	0.0733336	-0.0102041	0.509433	-0.181818	0.625214	0.666246
Bacteria;Firmicutes;Clostridia;Clostridiales;Ruminococcaceae;Ruminococcaceae_UCG-011;Ruminococcaceae_UCG-011_sp.	0.265313	0.142857	NA	0	NA	0.666246
Bacteria;Firmicutes;Clostridia;Clostridiales;Ruminococcaceae;Ruminococcaceae_UCG-013;Ruminococcaceae_UCG-013_gut_metagenome	0.297259	-0.0816327	0.780607	0.012987	0.820502	0.666246
Bacteria;Firmicutes;Clostridia;Clostridiales;Ruminococcaceae;Ruminococcaceae_UCG-013;Ruminococcaceae_UCG-013_sp.	0.786867	-0.0510204	0.501184	-0.142857	0.623273	0.866349
Bacteria;Firmicutes;Clostridia;Clostridiales;Ruminococcaceae;Ruminococcaceae_UCG-014;Ruminococcaceae_UCG-014_sp.	0.54087	-0.22449	0.373812	-0.233766	0.601032	0.736506
Bacteria;Firmicutes;Clostridia;Clostridiales;Ruminococcaceae;UBA1819;UBA1819_sp.	0.367042	0.214286	0.351839	0	0.601032	0.666246
Bacteria;Firmicutes;Clostridia;Clostridiales;Ruminococcaceae;unknown_Ruminococcaceae;unknown_Ruminococcaceae	0.447266	0.0510204	0.819664	-0.298701	0.843083	0.666246
Bacteria;Firmicutes;Clostridia;Clostridiales;unknown_Clostridiales;unknown_Clostridiales;unknown_Clostridiales	0.16786	0.336735	0.841342	-0.363636	0.857216	0.666246
Bacteria;Firmicutes;Clostridia;unknown_Clostridia;unknown_Clostridia;unknown_Clostridia;unknown_Clostridia	0.129068	-0.142857	0.745243	-0.0519481	0.805628	0.666246
Bacteria;Firmicutes;Erysipelotrichi;Erysipelotrichales;Erysipelotrichaceae;[Eubacterium];[Eubacterium]_dolichum	NA	NA	0.366502	0.0909091	0.601032	NA
Bacteria;Firmicutes;Erysipelotrichia;Erysipelotrichales;Erysipelotrichaceae;Coprobacillus;Coprobacillus_sp.	0.458426	0.0714286	0.378324	0.0909091	0.601032	0.666246
Bacteria;Firmicutes;Erysipelotrichia;Erysipelotrichales;Erysipelotrichaceae;Erysipelatoclostridium;Erysipelatoclostridium_sp.	0.300155	-0.0204082	0.624351	0.0519481	0.725053	0.666246
Bacteria;Firmicutes;Erysipelotrichia;Erysipelotrichales;Erysipelotrichaceae;Erysipelotrichaceae_UCG-003;Erysipelotrichaceae_UCG-003_sp.	0.129068	-0.142857	0.163147	-0.142857	0.554596	0.666246
Bacteria;Firmicutes;Erysipelotrichia;Erysipelotrichales;Erysipelotrichaceae;Firmicutes_bacterium_CAG:345;Firmicutes_bacterium_CAG:345_sp.	0.350481	-0.0816327	0.103935	-0.285714	0.554596	0.666246
Bacteria;Firmicutes;Erysipelotrichia;Erysipelotrichales;Erysipelotrichaceae;unknown_Erysipelotrichaceae;unknown_Erysipelotrichaceae	0.396488	0.0714286	0.378324	0.0909091	0.601032	0.666246
Bacteria;Firmicutes;Erysipelotrichia;Erysipelotrichales;unknown_Erysipelotrichales;unknown_Erysipelotrichales;unknown_Erysipelotrichales	0.15994	-0.153061	0.237777	-0.194805	0.554596	0.666246
Bacteria;Firmicutes;Negativicutes;Selenomonadales;Acidaminococcaceae;Phascolarctobacterium;Phascolarctobacterium_gut_metagenome	0.624571	0.204082	0.269611	0.441558	0.594244	0.756425
Bacteria;Firmicutes;Negativicutes;Selenomonadales;Acidaminococcaceae;Phascolarctobacterium;Phascolarctobacterium_sp.	NA	NA	NA	0	NA	NA
Bacteria;Firmicutes;Negativicutes;Selenomonadales;Veillonellaceae;Veillonella;Veillonella_Veillonella_dispar	0.63603	-0.22449	0.555233	-0.272727	0.666279	0.761838
Bacteria;Firmicutes;Negativicutes;Selenomonadales;Veillonellaceae;unknown_Veillonellaceae;unknown_Veillonellaceae	NA	0	NA	0	NA	NA
Bacteria;Fusobacteria;Fusobacteriia;Fusobacteriales;Fusobacteriaceae;Fusobacterium;Fusobacterium_sp.	0.597512	-0.0714286	0.183594	-0.142857	0.554596	0.752048
Bacteria;Lentisphaerae;Lentisphaeria;Victivallales;Victivallaceae;Victivallis;Victivallis_sp.	0.129068	-0.142857	0.728502	-0.0519481	0.802839	0.666246
Bacteria;Proteobacteria;Alphaproteobacteria;Rhodospirillales;unknown_Rhodospirillales;unknown_Rhodospirillales;unknown_Rhodospirillales	0.28608	0.142857	0.366502	0.0909091	0.601032	0.666246
Bacteria;Proteobacteria;Gammaproteobacteria;Enterobacteriales;Enterobacteriaceae;Escherichia-Shigella;Escherichia-Shigella_sp.	0.435272	0.142857	0.0452952	0.272727	0.554596	0.666246
Bacteria;Proteobacteria;Gammaproteobacteria;Pasteurellales;Pasteurellaceae;Haemophilus;Haemophilus_sp.	NA	0	0.476591	0.0909091	0.620142	NA
Bacteria;Proteobacteria;Gammaproteobacteria;Pasteurellales;Pasteurellaceae;Haemophilus;Haemophilus_uncultured_organism	NA	0	0.187913	0.181818	0.554596	NA
Bacteria;Proteobacteria;Gammaproteobacteria;Xanthomonadales;Xanthomonadaceae;Pseudoxanthomonas;Pseudoxanthomonas_sp.	NA	NA	0.158837	-0.142857	0.554596	NA
Bacteria;Synergistetes;Synergistia;Synergistales;Synergistaceae;Pyramidobacter;Pyramidobacter_Pyramidobacter_piscolens	NA	0	0.406253	0.0909091	0.601032	NA
Bacteria;Tenericutes;Mollicutes;Mollicutes_RF39;unknown_Mollicutes_RF39;unknown_Mollicutes_RF39;unknown_Mollicutes_RF39	0.260267	0.122449	0.387468	-0.038961	0.601032	0.666246
Bacteria;unknown_Bacteria;unknown_Bacteria;unknown_Bacteria;unknown_Bacteria;unknown_Bacteria;unknown_Bacteria	0.752026	0.0510204	0.585185	-0.038961	0.694465	0.84818
Eukaryota;Vertebrata;Mammalia;unknown_Mammalia;unknown_Mammalia;unknown_Mammalia;unknown_Mammalia	0.246705	-0.0612245	0.158837	-0.142857	0.554596	0.666246
|δ| < 0.33 corresponds to small,
|δ| < 0.474 corresponds to medium,
otherwise large.
