# Supplementary material for: Dynamic Changes in Microbiome Composition Following Mare’s Milk Intake for Prevention of Collateral Antibiotic Effect
Source: Front Cell Infect Microbiol. 2021 Apr 21;11:622735. doi: 10.3389/fcimb.2021.622735 (PMC8097163; doi:10.3389/fcimb.2021.622735)
Supplement: Supplementary file 3 [file Table_2.xlsx]

## Sheet: Лист1
Marker	P (baseline vs day 3)	Effect size (baseline vs day 3)	P (baseline vs day 10)	Effect size (baseline vs day 10)	P (baseline vs day 20)	Effect size (baseline vs day 20)	P (baseline vs day 60)	Effect size (baseline vs day 60)	P (baseline vs day 3, AB)	Effect size (baseline vs day 3, AB)	P (baseline vs day 10, AB)	Effect size (baseline vs day 10, AB)	P (baseline vs day 20, AB)	Effect size (baseline vs day 20, AB)	P (baseline vs day 60, AB)	Effect size (baseline vs day 60, AB)	P (baseline vs day 3, MM)	Effect size (baseline vs day 3, MM)	P (baseline vs day 10, MM)	Effect size (baseline vs day 10, MM)	P (baseline vs day 20, MM)	Effect size (baseline vs day 20, MM)	P (baseline vs day 60, MM)	Effect size (baseline vs day 60, MM)	FDR (baseline vs day 3)	FDR (baseline vs day 10)	FDR (baseline vs day 20)	FDR (baseline vs day 60)	FDR (baseline vs day 3, AB)	FDR (baseline vs day 10, AB)	FDR (baseline vs day 20, AB)	FDR (baseline vs day 60, AB)	FDR (baseline vs day 3, MM)	FDR (baseline vs day 10, MM)	FDR (baseline vs day 20, MM)	FDR (baseline vs day 60, MM)
Eotaxin	0.883853	0.125	0.685714	0.25	0.38363	0.4375	0.857143	0.166667	0.666667	NA	0.8	0.333333	1	0.166667	0.333333	1	1	-0.166667	0.666667	NA	0.666667	NA	0.666667	NA	0.970068	0.87619	1	1	1	0.968421	1	1	1	0.958333	0.814815	0.814815
FGF_2	0.114286	-0.75	0.300522	-0.5	1	-0.0625	0.857143	-0.166667	1	NA	0.8	-0.333333	0.8	0.333333	0.666667	0.5	0.2	-1	1	NA	1	NA	0.666667	NA	0.970068	0.864002	1	1	1	0.968421	1	1	0.628571	1	1	0.814815
G_CSF	0.467825	-0.375	0.029401	-1	1	0	1	0	1	NA	0.2	-1	0.8	0.333333	0.666667	0.5	0.4	-0.666667	0.666667	NA	0.666667	NA	0.666667	NA	0.970068	0.338112	1	1	1	0.46	1	1	0.733333	0.958333	0.814815	0.814815
GM_CSF	0.685714	-0.25	0.342857	-0.5	0.885714	-0.125	1	0	1	NA	0.2	-1	1	0	1	0	0.8	-0.333333	0.666667	NA	0.666667	NA	0.666667	NA	0.970068	0.87619	1	1	1	0.46	1	1	0.926316	0.958333	0.814815	0.814815
IgA	0.885714	-0.125	0.685714	-0.25	0.685714	-0.25	0.114286	-0.833333	0.666667	NA	0.2	-1	0.4	-0.666667	0.333333	-1	0.4	0.666667	1	NA	0.666667	NA	1	NA	0.970068	0.87619	1	1	1	0.46	1	1	0.733333	1	0.814815	1
IgG1	0.685714	0.25	0.114286	-0.75	0.685714	-0.25	1	-0.0833333	0.666667	NA	0.2	-1	0.2	-1	0.333333	-1	0.8	0.333333	0.666667	NA	0.666667	NA	0.666667	NA	0.970068	0.766667	1	1	1	0.46	1	1	0.926316	0.958333	0.814815	0.814815
IgG2	0.485714	-0.375	0.485714	-0.375	0.885714	-0.125	0.857143	-0.166667	1	NA	1	0	1	0	1	0	0.2	-1	0.666667	NA	0.666667	NA	0.666667	NA	0.970068	0.87619	1	1	1	1	1	1	0.628571	0.958333	0.814815	0.814815
IgG3	0.0285714	-1	0.485714	-0.375	0.485714	-0.375	0.228571	-0.666667	0.666667	NA	0.8	-0.333333	0.4	-0.666667	0.666667	-0.5	0.2	-1	0.666667	NA	0.666667	NA	0.666667	NA	0.657143	0.87619	1	1	1	0.968421	1	1	0.628571	0.958333	0.814815	0.814815
IL_13	0.885714	-0.125	0.685714	-0.25	0.685714	0.25	0.857143	-0.166667	0.666667	NA	0.4	-0.666667	1	0	1	0	0.8	-0.333333	0.666667	NA	0.666667	NA	1	NA	0.970068	0.87619	1	1	1	0.836364	1	1	0.926316	0.958333	0.814815	1
IL_1A	0.885714	-0.125	0.885714	-0.125	0.885714	-0.125	0.628571	-0.333333	0.666667	NA	0.8	-0.333333	0.8	-0.333333	0.333333	-1	0.4	0.666667	0.666667	NA	0.666667	NA	0.666667	NA	0.970068	1	1	1	1	0.968421	1	1	0.733333	0.958333	0.814815	0.814815
IL_1RA	0.2	-0.625	0.685714	-0.25	0.245383	-0.5625	0.721277	-0.25	1	NA	1	0	0.553617	-0.5	1	0.25	0.2	-1	1	NA	0.666667	NA	0.666667	NA	0.970068	0.87619	1	1	1	1	1	1	0.628571	1	0.814815	0.814815
IL_3	0.309424	0.5	0.191267	-0.625	0.467825	0.375	0.211798	0.666667	0.4795	NA	0.138641	-1	0.767097	0.333333	0.220671	1	1	0	1	NA	0.666667	NA	1	NA	0.970068	0.766667	1	1	1	0.46	1	1	1	1	0.814815	1
IL_8	0.309424	-0.5	0.029401	-1	0.561363	-0.3125	0.721277	-0.25	1	NA	0.138641	-1	1	0	1	0.25	0.4	-0.666667	0.666667	NA	0.666667	NA	0.666667	NA	0.970068	0.338112	1	1	1	0.46	1	1	0.733333	0.958333	0.814815	0.814815
IP_10	0.2	-0.625	0.663117	-0.25	0.342857	0.5	0.4	-0.5	1	NA	0.138641	-1	0.8	0.333333	1	0	0.4	-0.666667	0.666667	NA	0.666667	NA	0.666667	NA	0.970068	0.87619	1	1	1	0.46	1	1	0.733333	0.958333	0.814815	0.814815
MIP_1A	0.465124	-0.375	0.883853	-0.125	0.771503	-0.1875	0.628571	-0.333333	1	NA	1	0	1	0	1	0	0.2	-1	0.666667	NA	1	NA	0.666667	NA	0.970068	1	1	1	1	1	1	1	0.628571	0.958333	1	0.814815
MIP_1B	0.685714	-0.25	0.2	-0.625	1	0	1	0	1	NA	0.2	-1	1	0	1	0	1	0	1	NA	1	NA	1	NA	0.970068	0.766667	1	1	1	0.46	1	1	1	1	1	1
PDGF_AA	0.663117	-0.25	0.551616	0.3125	0.242526	0.5625	0.59256	-0.333333	1	NA	0.553617	-0.5	1	-0.166667	1	0	0.767097	-0.333333	0.4795	NA	0.4795	NA	0.4795	NA	0.970068	0.87619	1	1	1	0.909514	1	1	0.926316	0.958333	0.814815	0.814815
RANTES	0.453255	0.25	1	0	0.453255	0.25	NA	NA	0.4795	NA	0.683091	-0.333333	0.683091	0.333333	NA	NA	NA	NA	0.4795	NA	NA	NA	NA	NA	0.970068	1	1	NA	1	0.968421	1	NA	NA	0.958333	NA	NA
sCD40L	0.685714	-0.25	0.2	-0.625	0.885714	-0.125	0.857143	-0.166667	1	NA	0.2	-1	1	0	1	0	0.8	-0.333333	1	NA	0.666667	NA	0.666667	NA	0.970068	0.766667	1	1	1	0.46	1	1	0.926316	1	0.814815	0.814815
TGF_A	0.309424	0.5	0.242526	0.5625	1	0.0625	0.59256	0.333333	0.666667	NA	0.553617	0.5	1	-0.166667	1	0	0.8	0.333333	0.666667	NA	0.666667	NA	0.666667	NA	0.970068	0.79687	1	1	1	0.909514	1	1	0.926316	0.958333	0.814815	0.814815
TNFA	0.884549	-0.125	0.561363	-0.3125	1	0	1	0	0.666667	NA	1	0.166667	0.8	0.333333	0.666667	0.5	0.2	-1	0.666667	NA	0.666667	NA	0.666667	NA	0.970068	0.87619	1	1	1	1	1	1	0.628571	0.958333	0.814815	0.814815
TNFB	1	0	1	0	0.885714	0.125	0.721277	0.25	1	NA	0.138641	-1	0.8	-0.333333	1	0	0.8	0.333333	0.666667	NA	0.666667	NA	0.666667	NA	1	1	1	1	1	0.46	1	1	0.926316	0.958333	0.814815	0.814815
VEGF	1	0	1	-0.0625	0.885714	0.125	0.628571	-0.333333	0.666667	NA	0.553617	0.5	0.2	1	0.666667	0.5	0.2	-1	1	NA	1	NA	0.666667	NA	1	1	1	1	1	0.909514	1	1	0.628571	1	1	0.814815
